# Supplementary material for: Development and Characterization of Gelatin-Based Hydrogels Containing Triblock Copolymer and Phytic Acid
Source: MDPI journal article supplement (doi:10.3390/gels10050294), 2024-04-25
Supplement: s1 [file s1]

## Supplementary Materials

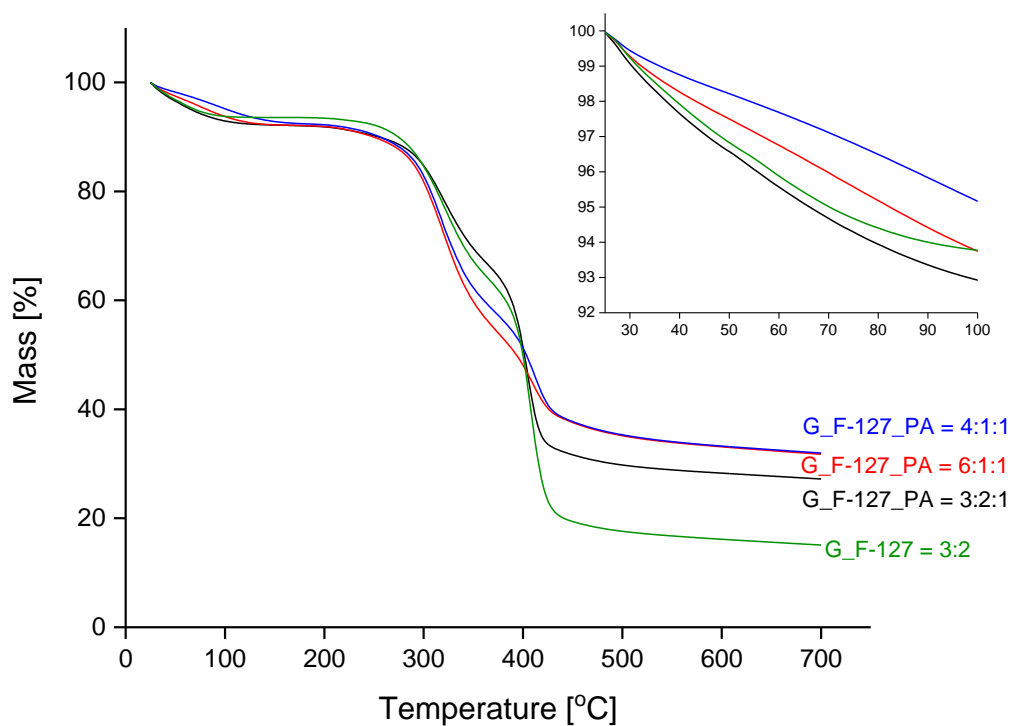

**Figure S1.** Dynamic TG curves of the lyophilized samples. Inset: the enlargement of the temperature range from 25 °C to 100 °C.

**Table S1.** Comparison of the mass loss of lyophilized hydrogels from room temperature to 100 °C.

| $\Delta m$ (25–100 °C) / % |                    |                    |               |
|----------------------------|--------------------|--------------------|---------------|
| G_F-127_PA = 4:1:1         | G_F-127_PA = 6:1:1 | G_F-127_PA = 3:2:1 | G_F-127 = 3:2 |
| 4.83                       | 6.25               | 7.07               | 6.22          |

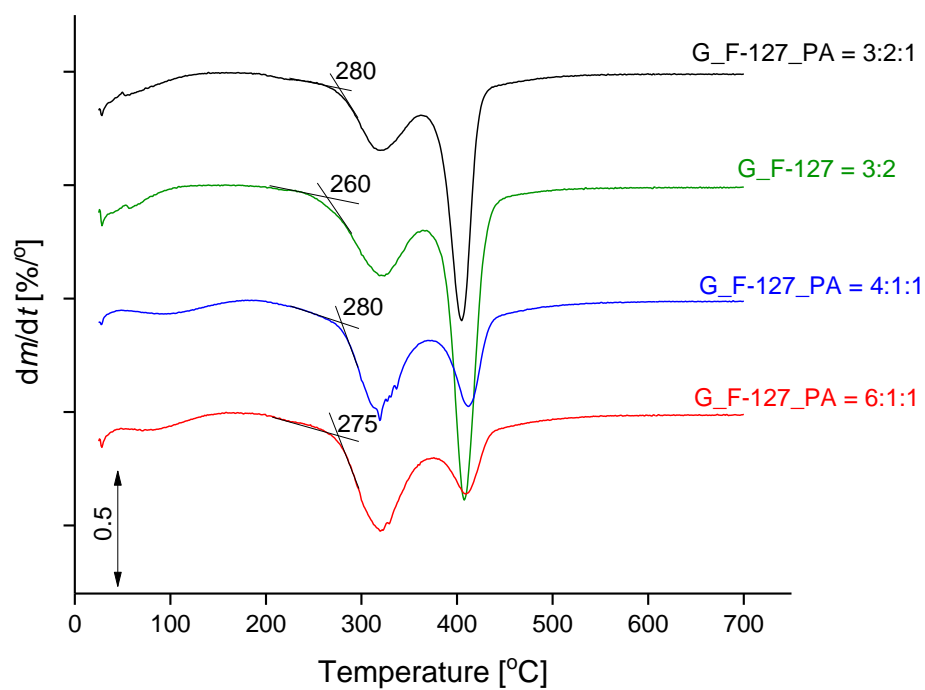

**Figure S2.** DTG curves of the lyophilized samples.

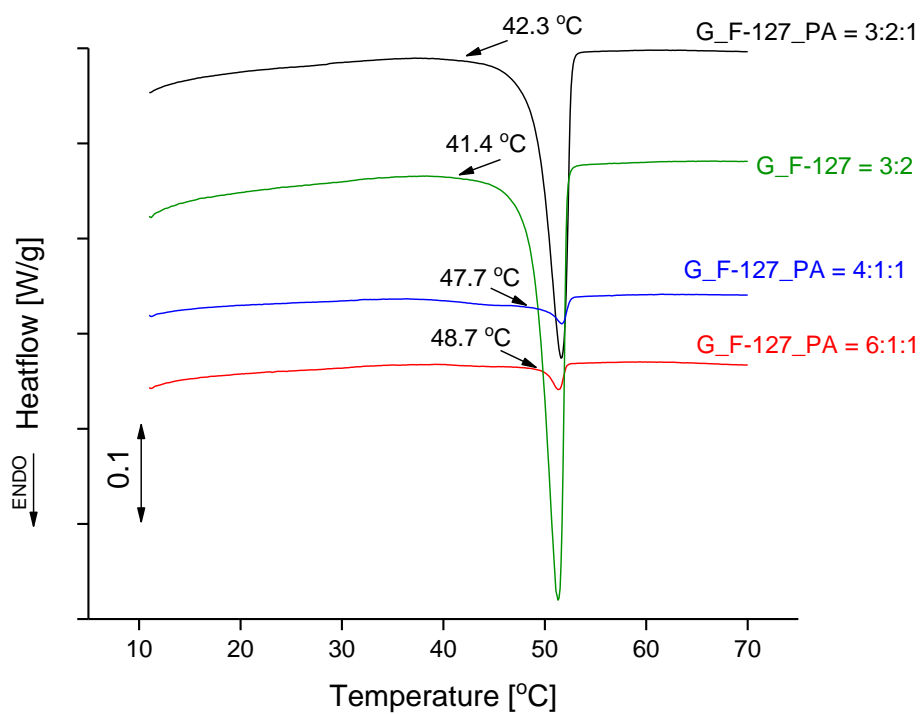

**Figure S3.** DSC curves of the lyophilized samples.

**Table S2.** Melting temperatures and the corresponding enthalpies of the lyophilized samples.

| sample             | Onset melting temperature / °C | $\Delta H$ / J g <sup>-1</sup> |
|--------------------|--------------------------------|--------------------------------|
| G_F-127_PA = 4:1:1 | 49.6                           | 2.77                           |
| G_F-127_PA = 6:1:1 | 49.9                           | 1.28                           |
| G_F-127_PA = 3:2:1 | 48.9                           | 26.7                           |
| G_F-127 = 3:2      | 48.8                           | 34.2                           |
